# Supplementary figures and images for: Measurement of ultrasonic phase and group velocities in human dental hard tissue
Source: Springer Nature journal article supplement (doi:10.1186/2050-5736-1-5), 2013-01-01

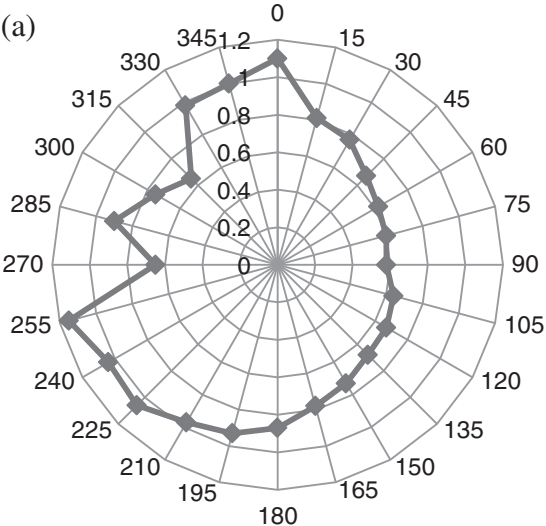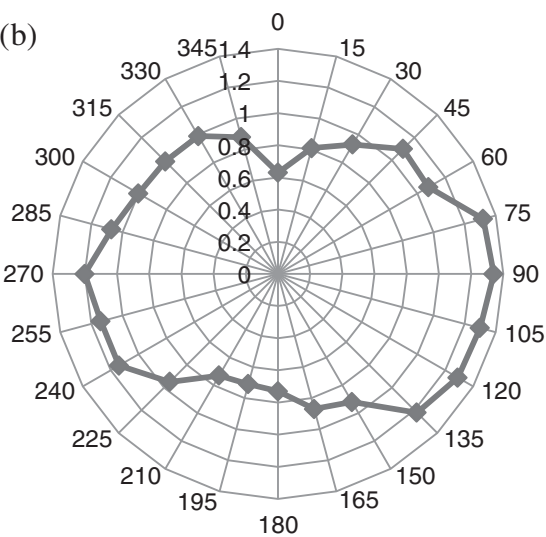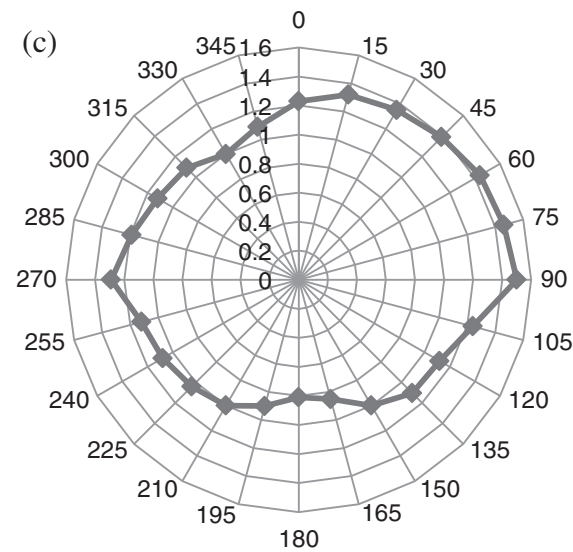

Supplement: 40349_2012_6_MOESM6_ESM.pdf [file 40349_2012_6_MOESM6_ESM.pdf]
